# Supplementary material for: Assessment of the Toxicity of Aluminum Oxide and Its Nanoparticles in the Bone Marrow and Liver of Male Mice: Ameliorative Efficacy of Curcumin Nanoparticles
Source: PubMed Central journal article supplement — ACS Omega. 2022 Apr 14;7(16):13841–52. doi: 10.1021/acsomega.2c00195 (PMC9088947; doi:10.1021/acsomega.2c00195), 2022-04-14
Supplement: ao2c00195_si_001.pdf [file ao2c00195_si_001.pdf]

## Supplementary material

### **Assessment of the toxicity of aluminum oxide and its nanoparticles in bone marrow and liver of male mice: Ameliorative efficacy of curcumin nanoparticles**

Alshaimaa A. I. Alghriany<sup>1</sup>, Hossam EL-din M. Omar<sup>2</sup>, Amera M. Mahmoud<sup>2</sup>, and Mona M. Atia<sup>1,\*</sup>

<sup>1</sup>Laboratory of Molecular Cell Biology; Department of Zoology, Faculty of Science, Assiut University, Egypt

<sup>2</sup>Laboratory of Physiology, Department of Zoology, Faculty of Science, Assiut University, Egypt

**\*Corresponding author:** Mona M. Atia

Laboratory of Molecular Cell Biology, Department of Zoology, Faculty of Science, Assiut University, Assiut 71516, Egypt; Tel. +201061996606; E-mail: monatia@aun.edu.eg

**Table (S1):** Effect of Al<sub>2</sub>O<sub>3</sub>, Al<sub>2</sub>O<sub>3</sub>NPs, N.Cur. on plasma activities of liver functions, AST, and ALT in male mice

|                  | Control          |  | Al <sub>2</sub> O <sub>3</sub> |                | Al <sub>2</sub> O <sub>3</sub> NPs |                | Al <sub>2</sub> O <sub>3</sub> +N.Cur. |                | Al <sub>2</sub> O <sub>3</sub> NPs+N.Cur |                |
|------------------|------------------|--|--------------------------------|----------------|------------------------------------|----------------|----------------------------------------|----------------|------------------------------------------|----------------|
|                  | Mean<br>± SE     |  | Mean± SE                       | % of<br>change | Mean± SE                           | % of<br>change | Mean±<br>SE                            | % of<br>change | Mean±<br>SE                              | % of<br>change |
| <b>AST (U/L)</b> | 31.04<br>± 3.017 |  | 46.85 ↑<br>± 2.281**           | 50.9 %         | 64.45 ↑<br>± 1.457*                | 107.6%         | 36.48 ↓±<br>2.021                      | 17.5%          | 57↓±<br>1.155**                          | 83.6%          |
| <b>ALT (U/L)</b> | 18.52<br>± 1.092 |  | 29.70 ↑<br>± 1.155*            | 60.4 %         | 40.35 ↑<br>±0.8578*                | 117.9%         | 22.72↓<br>± 2.031                      | 22.7%          | 33.05 ↓<br>±1.518*                       | 78.4%          |

Data are represented as mean ± SE. Number of rats (n)= 5. \*= significant difference from control at P<0.05, \*\*= significant difference from control at P<0.01.
